# Supplementary material for: Dynamic interaction of MYC enhancer RNA with YEATS2 protein regulates MYC gene transcription in pancreatic cancer
Source: Springer Nature journal article supplement (doi:10.1038/s44319-025-00446-0), 2025-04-11
Supplement: MOESM10 [file 44319_2025_446_MOESM10_ESM.pdf]

## Expanded View Figures

### Figure EV1. Induction of chronic inflammation in mammalian cell lines.

(A) Survival plot analysis depicting the impact of *MYC* amplification status on the overall survival of patients in the GSE-62452 cohort. Through 24 h treatment of TNF- $\alpha$ , a chronic inflammatory condition was mimicked in (B) MIA PaCa-2, data are presented as mean  $\pm$  SD from three independent experiments ( $n = 3$ ). Statistical significance was determined using an unpaired two-tailed  $t$  test: \*\*\* $P = 0.0003$  and \*\*\* $P = 0.0002$  for IL-6 and IL-1 $\beta$  respectively and (C) AsPC-1, data are presented as mean  $\pm$  SD from three independent experiments ( $n = 3$ ). Statistical significance was determined using an unpaired two-tailed  $t$  test: \*\*\* $P = 0.00015$  and \*\*\*\* $P = < 0.0001$  for IL-6 and IL-1 $\beta$  respectively. (D) HPNE cell lines which has been shown by significant increase in the expression level of pro-inflammatory cytokines IL-6 and IL-1 $\beta$ . Data are presented as mean  $\pm$  SD from three independent experiments ( $n = 3$ ). Statistical significance was determined using an unpaired two-tailed  $t$  test: \*\*\* $P = 0.0008$  and \*\*\* $P = 0.0006$  for IL-6 and IL-1 $\beta$  respectively. (E) Validation of *MYC* eRNA and *MYC* mRNA expression was performed using RT-PCR in TNF- $\alpha$  stimulated HCT-116 cells for 0 h and 24 h, data are presented as mean  $\pm$  SD from three independent experiments ( $n = 3$ ). Statistical significance was determined using an unpaired two-tailed  $t$  test: \*\*\*\* $P = < 0.0001$ , \*\* $P = 0.0082$  and \*\*\*\* $P = 0.0001$  for *MYC*-490, *MYC*-425, and *MYC* mRNA respectively and the expression level of pro-inflammatory cytokines IL-6 and IL-1 $\beta$  \*\* $P = 0.0015$ , \*\*\* $P = 0.0008$  respectively was measured in those conditions.

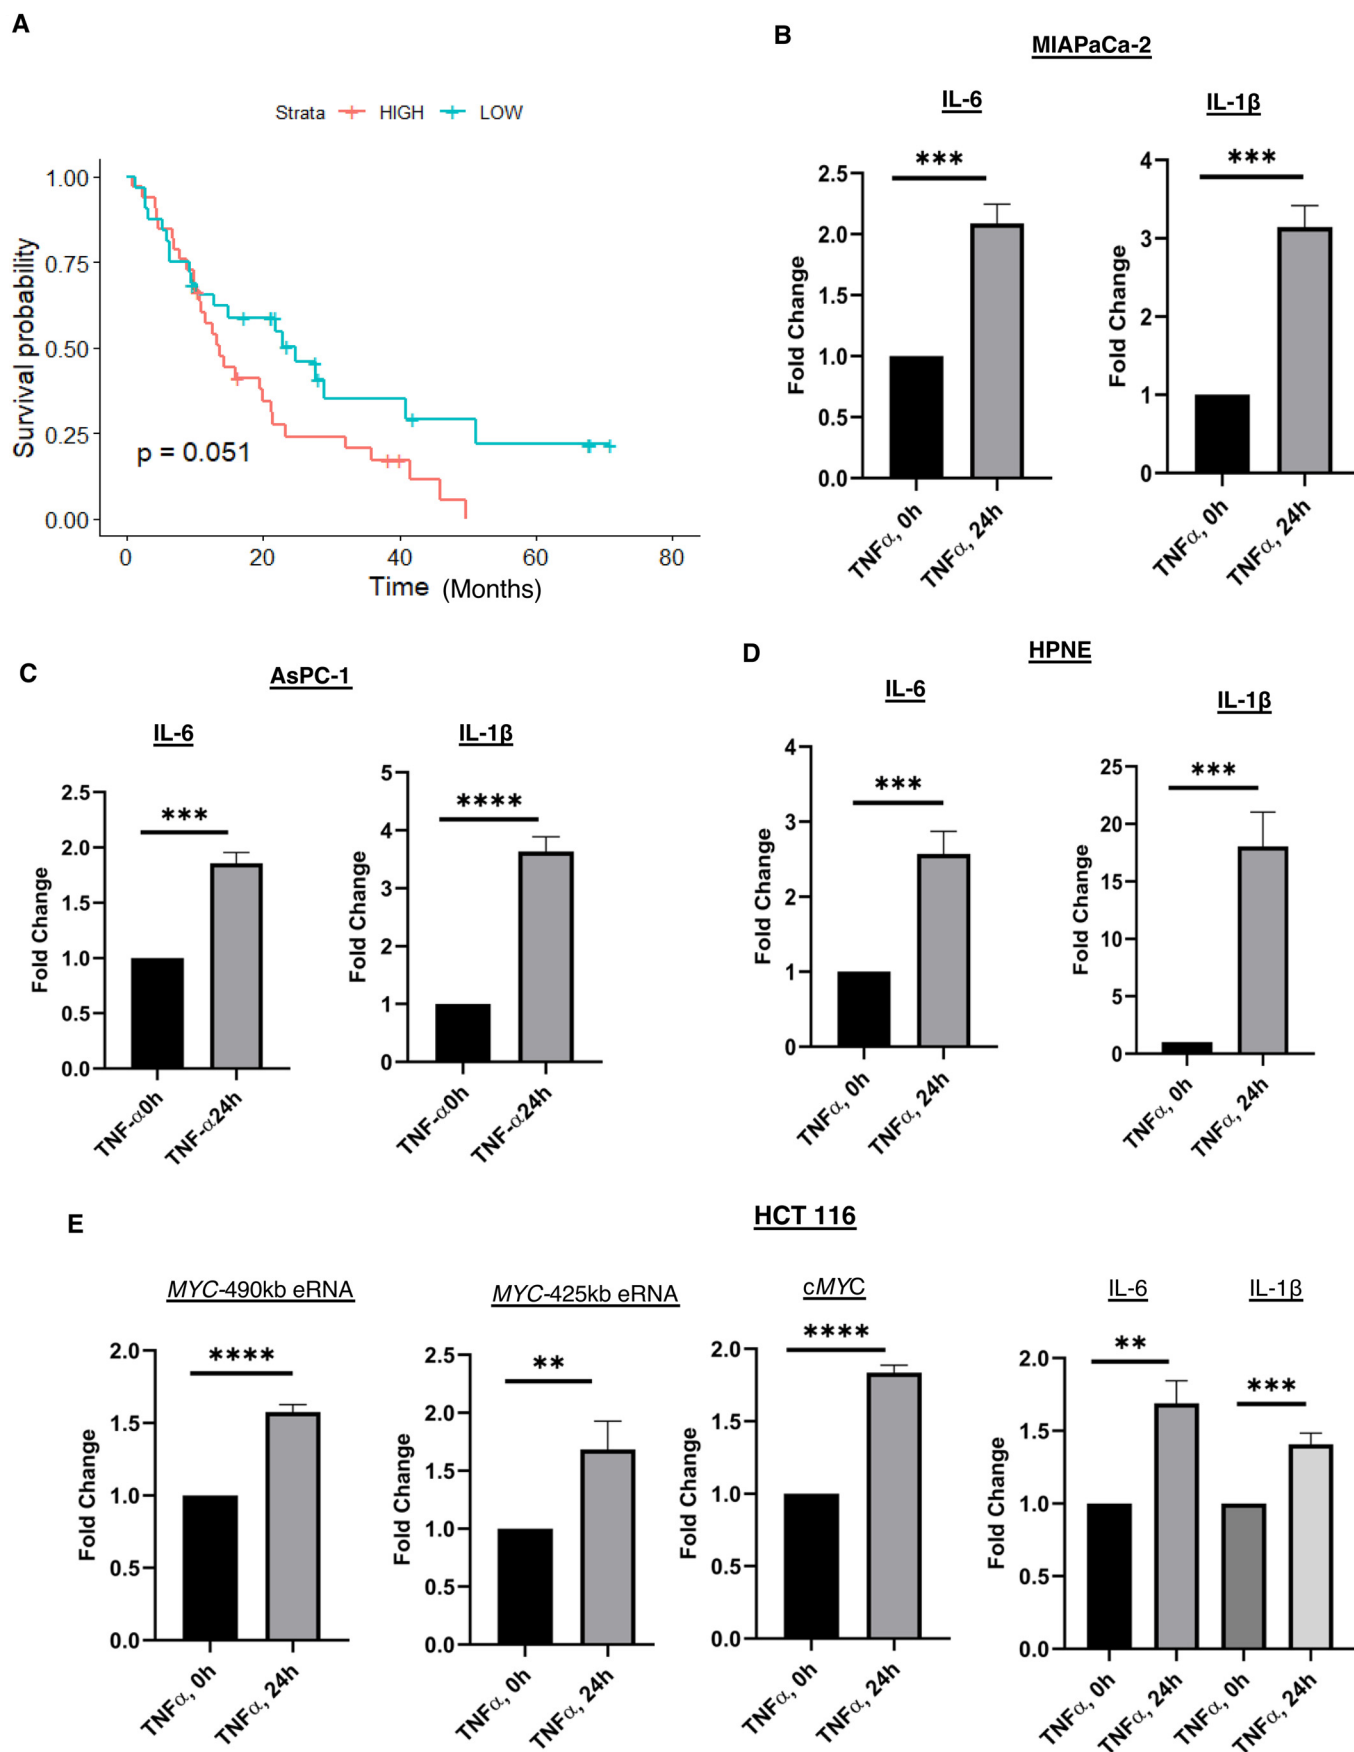

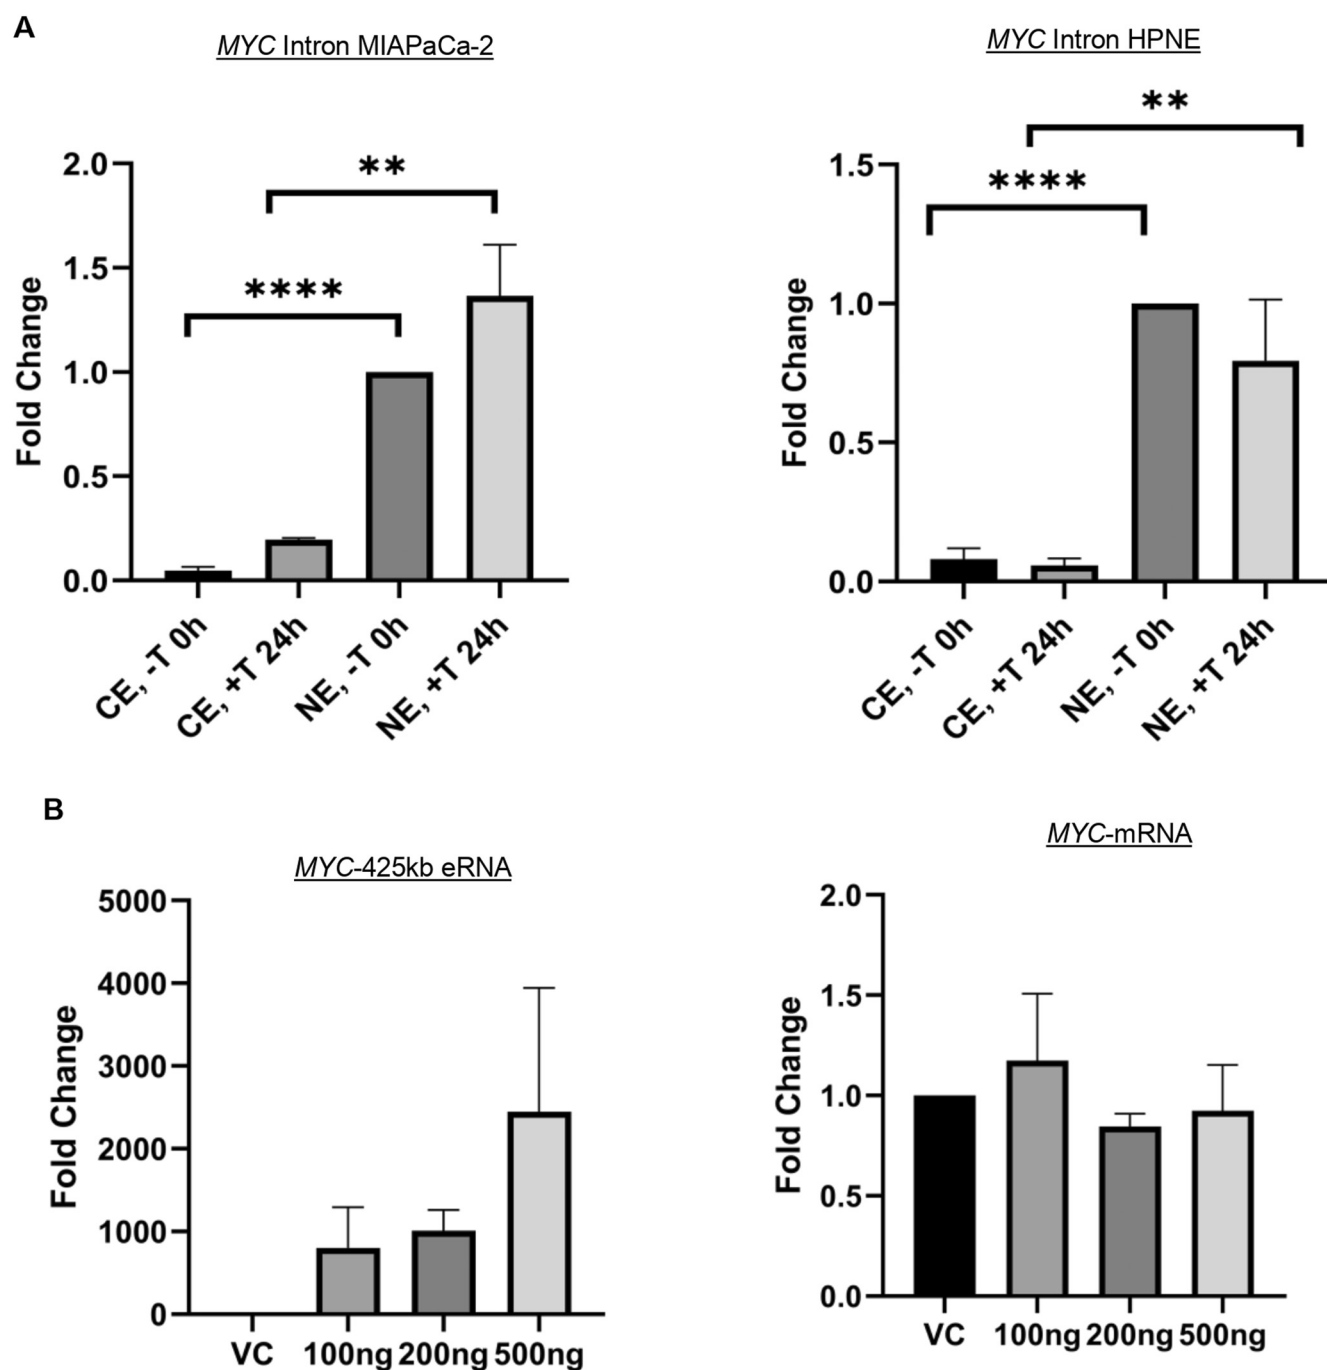

**Figure EV2. Analysis of MYC Intron from fractions as well as MYC-425-kb eRNA driven MYC mRNA expression by RT-PCR.**

(A) MYC intron RNA level was checked by qRT-PCR using intron specific primer from cytosolic and nuclear fraction of MIAPaCa-2 (left panel). Data are presented as mean  $\pm$  SD from three independent experiments ( $n = 3$ ). Statistical significance was determined using an unpaired two-tailed  $t$  test: \*\*\*\* $P = < 0.0001$  and \*\* $P = 0.0012$  for TNF- $\alpha$  0 h and 24 h respectively and HPNE cells (right panel), data are presented as mean  $\pm$  SD from three independent experiments ( $n = 3$ ). Statistical significance was determined using an unpaired two-tailed  $t$  test: \*\*\*\* $P = < 0.0001$  and \*\* $P = 0.0045$  for TNF- $\alpha$  0 h and 24 h respectively. (B) MIAPaCa-2 cells were transfected with plasmid expressing MYC-425-kb eRNA (left panel), at increasing gradient of concentration for 48 h and MYC mRNA expression (right panel) were checked by RT-PCR. The data represented the mean and s.e.m. of  $n = 3$  independent experiments.

**A**

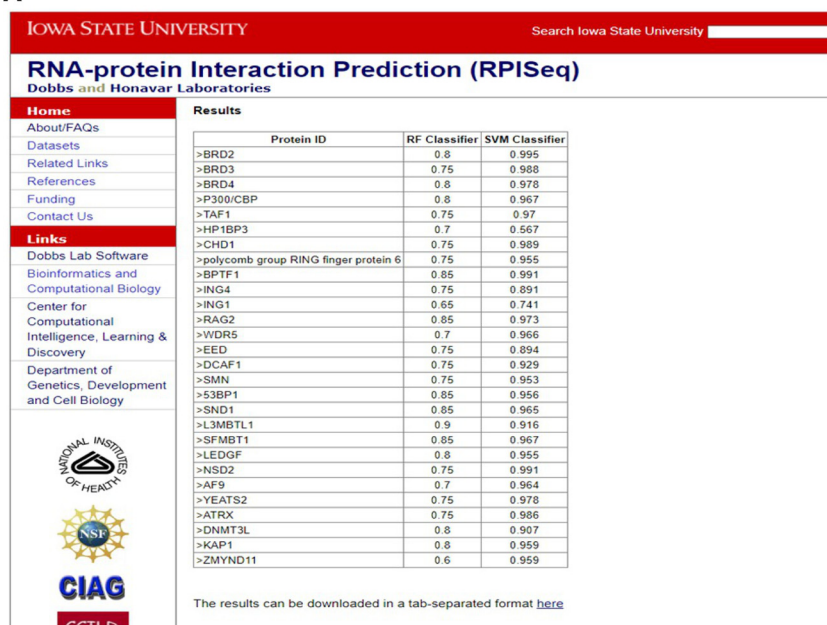

The results can be downloaded in a tab-separated format [here](#)

C

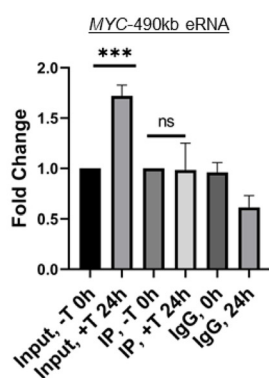

|                   | Input |    | IP: BRD4 |    | IP: IgG |    |       |
|-------------------|-------|----|----------|----|---------|----|-------|
| TNF- $\alpha$ (h) | 0     | 24 | 0        | 24 | 0       | 24 |       |
|                   |       |    |          |    |         |    | BRD4  |
|                   |       |    |          |    |         |    | GAPDH |

**D** *MYC*-425kb eRNA

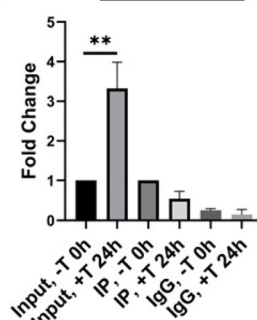

| Input |    | IP: YEATS2 |    | IP: IgG |    | TNF- $\alpha$ (h) |  |
|-------|----|------------|----|---------|----|-------------------|--|
| 0     | 24 | 0          | 24 | 0       | 24 |                   |  |
|       |    |            |    |         |    | YEATS2            |  |
|       |    |            |    |         |    | GAPDH             |  |

**E**

**YEATS2 PROTEIN AA Sequence HUMAN:**

[illegible]

F

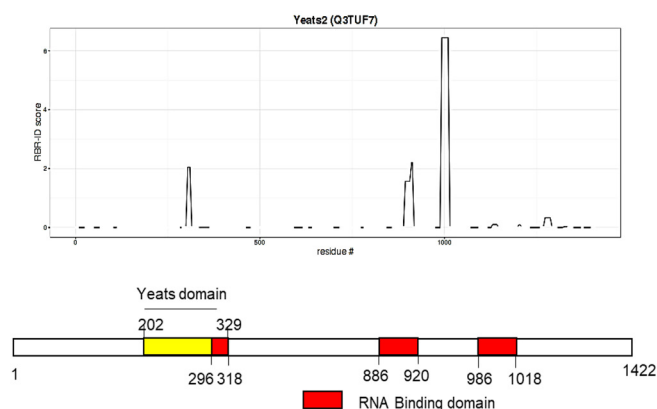

B

| Protein  | Hdock score |
|----------|-------------|
| BRD2     | 0.9863      |
| BRD3     | 0.9764      |
| BRD4     | 0.9745      |
| P300/CBP | 0.9571      |
| TAF1     | 0.9671      |
| HP1BP3   | 0.8798      |
| CHD1     | 0.9674      |
| PCGF6    | 0.9250      |
| BPTF1    | 0.9437      |
| ING4     | 0.9072      |
| ING1     | 0.9340      |
| RAG2     | 0.8752      |
| WDR5     | 0.9300      |
| EED      | 0.9840      |
| DCAF1    | 0.8880      |
| SMN      | 0.8728      |
| 53BP1    | 0.9776      |
| SND1     | 0.9546      |
| L3MBTL1  | 0.9810      |
| SFMBT1   | 0.9589      |
| LEDGF    | 0.9187      |
| NSD2     | 0.9462      |
| AF9      | 0.9575      |
| YEATS2   | 0.9758      |
| ATRX     | 0.9737      |
| DNMT3L   | 0.9697      |
| KAP1     | 0.9723      |
| ZMYND11  | 0.9638      |

**Figure EV3. MYC-490-kb eRNA interacts with YEATS2, a component of ATAC-HAT complex.**

(A) Analysis by RPIseq software to check the interaction between MYC-490-kb enhancer RNA and different histone reader molecules. (B) Analysis by HDOCK web server tool to check the interaction between MYC-490-kb enhancer RNA and different histone reader molecules. (C) UV-RIP experiment was performed in MIAPaCa-2 cells in TNF- $\alpha$  stimulated condition and BRD4 associated MYC-490 eRNA was checked by qRT-PCR. Data are presented as mean  $\pm$  SD from three independent experiments ( $n = 3$ ). Statistical significance was determined using an unpaired two-tailed  $t$  test:  $***P = 0.0003$  for Input and ns for IP. Western blot was performed to check successful pulldown of BRD4 protein. GAPDH served as loading control. (D) UV-RIP experiment was performed in MIAPaCa-2 cells in TNF- $\alpha$  stimulated condition and YEATS2 associated MYC-425 eRNA was checked by qRT-PCR. Data are presented as mean  $\pm$  SD from three independent experiments ( $n = 3$ ). Statistical significance was determined using an unpaired two-tailed  $t$  test:  $**P = 0.0037$  for Input. Western blot was performed to check successful pulldown of YEATS2 protein. GAPDH served as loading control. (E) Amino acid sequence of YEATS2 showing the Tyr residue (Red color) throughout the protein. The YEATS domain was marked with yellow color, and the three RNA binding domains were marked with purple color. (F) The three RNA binding motifs as shown in RBR-ID from Bonasio's lab (upper panel). A schematic of YEATS2 protein showing the overlapping region of YEATS domain with the 1st RNA binding motif (lower panel).

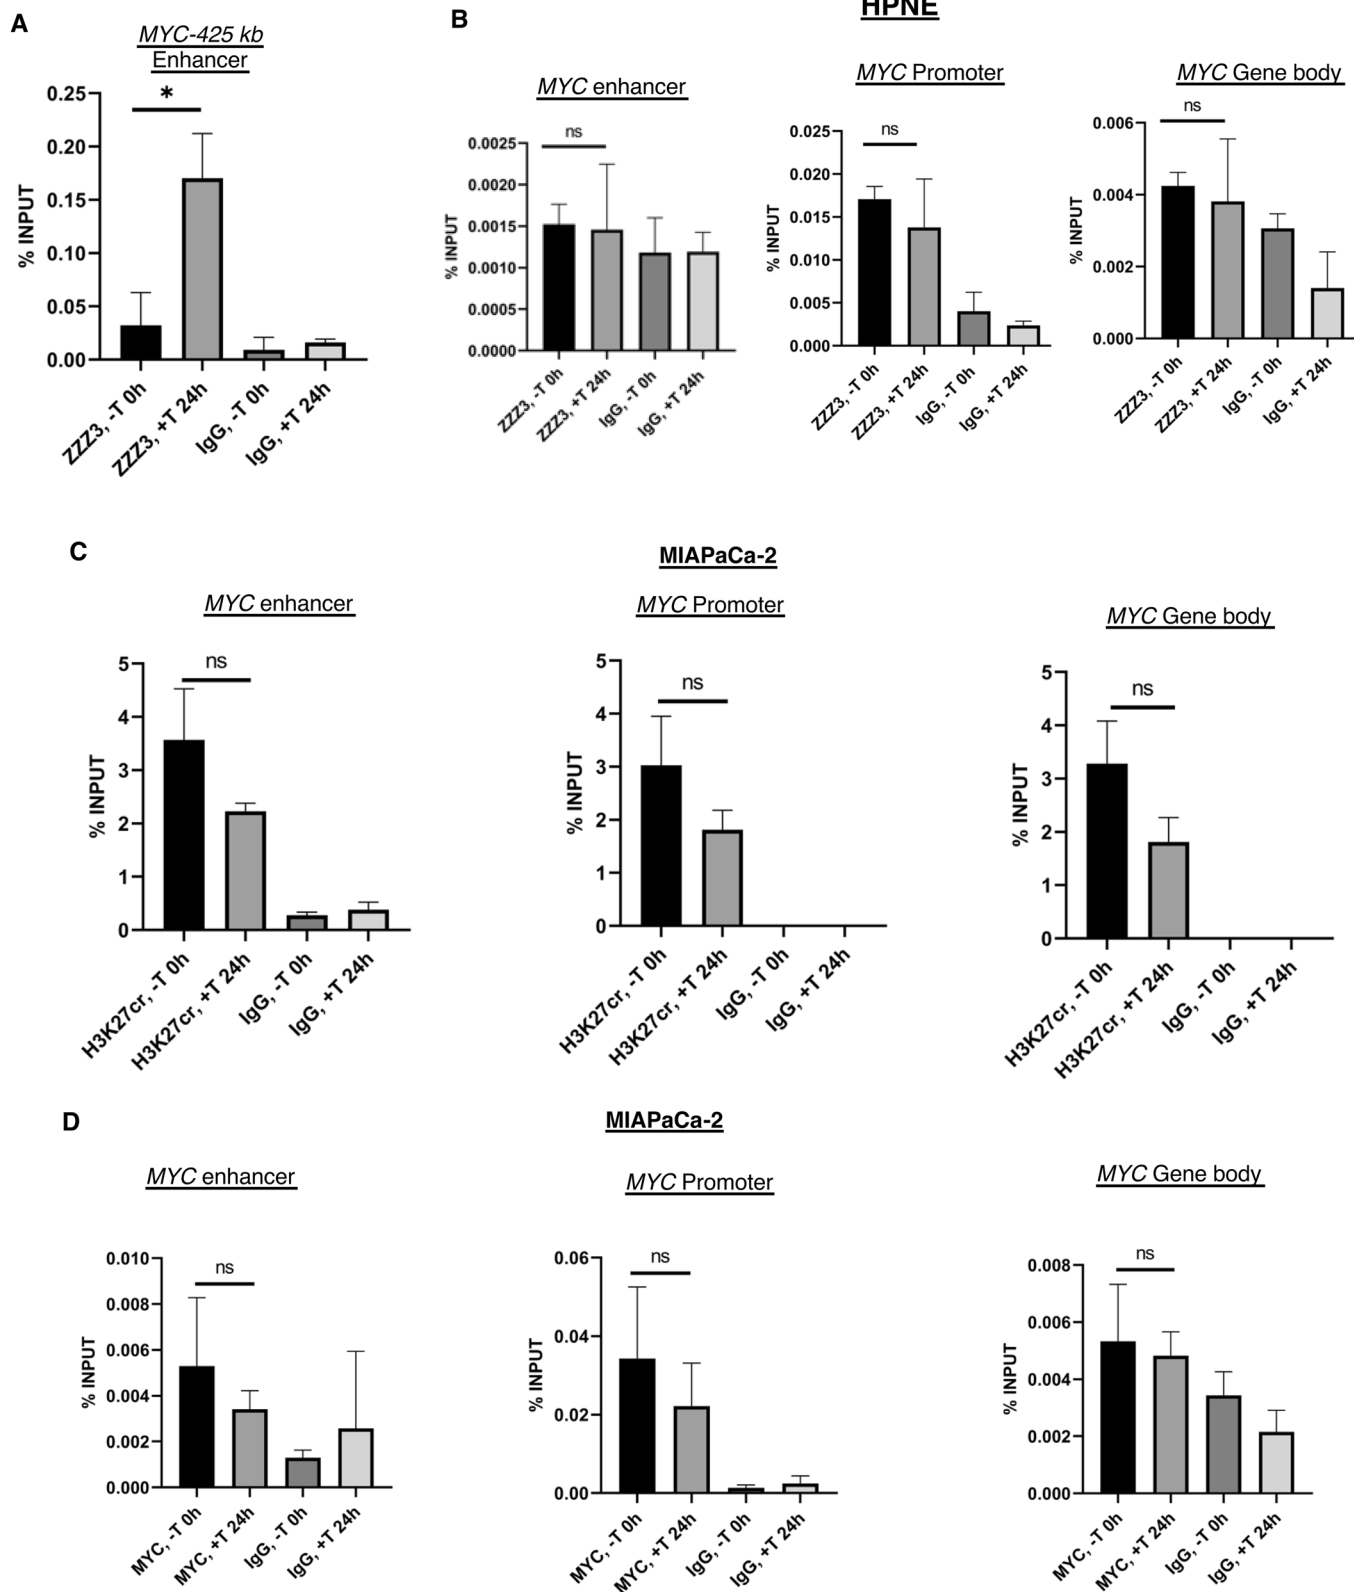

**Figure EV4. Neither MYC occupancy nor H3K27cr level was increased in MYC promoter/enhancer region with TNF stimulation.**

(A) ChIP-qPCR analysis was performed using ZZZ3 antibody to check YEATS2-containing ATAC complex occupancy in 24 h TNF- $\alpha$  stimulated condition at MYC-425-kb enhancer region. Data are presented as mean  $\pm$  SD from three independent experiments ( $n = 3$ ). Statistical significance was determined using an unpaired two-tailed  $t$  test:  $*P = 0.0146$  for Input. (B) There was no significant change in YEATS2 occupancy (measured by ZZZ3 antibody) at promoter region or enhancer region (490 kb upstream) as well as gene body of MYC gene between 0 h and 24 h of TNF- $\alpha$  treatment in HPNE cell line. (C) ChIP-qPCR study was performed using H3K27cr (crotonylation) antibody from TNF- $\alpha$  treated MIAPaCa-2 cells in both enhancer and promoter region as well as gene body. (D) Similar ChIP-qPCR was done with MYC antibody to assess MYC TF occupancy in MYC promoter and/or enhancer and also in gene body of 0 h and 24 h of TNF- $\alpha$  treated MIAPaCa-2 cells. The data represented the mean and s.e.m. of  $n = 3$  independent experiments. Statistical significance was determined by a two-tailed Student's  $t$  test. ns, not significant.
